# Supplementary material
Source: PubMed Central journal article supplement (PMC2930199)
Supplement: NIHMS229959-supplement-Proshkinsuppl.pdf [file NIHMS229959-supplement-Proshkinsuppl.pdf]

## SUPPORTING ONLINE MATERIAL

### Materials and Methods

**Strains and plasmids.** We used *E. coli* strain MG1665 and streptomycin-pseudo-dependent strain CH184 (W3110 derivative zhd-126::Tn10 *~rpsL*(SmP)) kindly provided by Dr. Diarmaid Hughes (Uppsala University) (1).

The plasmid pUV12 was previously described (2). The fusion *E. coli* gene *rplB-tufA* was constructed in one reading frame by PCR using a pair of overlapped oligos partly complementary to the 3'-end of *rplB* and 5'-end of *tufA* and a pair of specific oligos complementary to the proximal part of *rplB* and distal part of *tufA*. The amplified fragment *rplB-tufA* harboring RBS of *rplB* was cloned into the *Bam*HI site of pUV12. The plasmid pUV12-SD was derived from pUV12 by inserting a 34 bp DNA fragment containing a synthetic RBS from the pET15 vector into the *Bam*HI site. The *Saccharomyces cerevisiae* gene *srb4* was amplified from yeast genomic DNA with specific oligos and cloned into the *Bam*HI site of pUV12-SD just after the RBS.

The plasmid p2EC is equivalent to pATC10 and was described previously (3). The plasmid p1EC was obtained by inserting the *trp* transcription terminator into the *Bam*HI site in p2EC in such a way that there is a unique *Bam*HI site upstream of the terminator sequence. The plasmid p<sup>RBS</sup>1EC was derived from p1EC by inserting a 37 bp spacer as well as the strong T7 g10 RBS into a *Bam*HI site maintaining the reading frame intact (no stop codons between the ATG and *lac* operator region).

**Measurement of the transcription elongation rate *in vivo*.** RNA preparation and dot blot analysis was done essentially as described in (2), except that *E. coli* MG1665 or CH184 overexpressing the *lac* repressor from a *placK* plasmid that harbors the *lacI<sup>q</sup>* gene and LB media were used. Cells harboring pUV12 were grown to an optical density of OD<sub>600</sub>~0.4. The two plasmids were maintained within the cell by double selection in ampicillin (100 µg/ml) and kanamycin (20 µg/ml). Transcription was induced at time 0 with 1mM isopropyl-β-D-thiogalactoside (IPTG). At 20 s intervals, 0.5 ml samples were withdrawn into precooled (-30°C) plastic tubes containing 0.2 ml stop solution (60% ethanol, 2% phenol, 10mM EDTA, pH8.0) to prevent transcription. RNA was isolated and hybridized as described in (4). Only those portions of plots where the hybridization appears as a linear function of time were taken into account.

Although the absolute levels of radioactivity in the dots varied to some extent between experiments, the transcription times were very reproducible.

**Determination of translation elongation rate *in vivo*.** All measurements were made essentially as described in (5, 6). *E. coli* strains MG1655 or CH184 were grown in LB to  $OD_{600} \sim 0.4$ . Expression from *lacZ* gene was induced by addition of 1mM IPTG at time zero. Subsequently, samples of 0.2 ml were removed at 15 s intervals and immediately mixed with 0.3 ml ice-cold chloramphenicol solution (1 mg/ml in H<sub>2</sub>O). The samples were then processed as described in (7) with suitable dilution. After the addition of Na<sub>2</sub>CO<sub>3</sub>, and centrifugation, the formation of o-nitrophenol was determined by measuring the optical density at 420 nm of each sample. Values were corrected by subtracting the average absorbance of duplicate samples taken immediately after the addition of IPTG and by normalizing cell densities and incubation times. The data were analyzed using a square-root plot (8). The number of amino acid residues in the  $\beta$ -galactosidase monomer is 1023. This number is divided by the time required to make the first functional monomers of the enzyme, after addition of IPTG. The results are a measure of the average elongation rate of the ribosomes translating *lac* mRNA.

#### ***In situ* DNA footprinting and RNA analyses**

*In situ* DNA probing with CAA and subsequent analyses of modifications by primer extension with Klenow fragment of DNA polymerase I were carried out as previously described (9-11). *E. coli* MG1655 cells harboring the pLacK and the p<sup>RBS</sup>1EC (or p2EC or p1EC) plasmids were grown to an  $OD_{600} \sim 0.4$  in 10 ml of M9 medium supplemented with 0.4% glucose, 4 mg/ml casamino acids, 100  $\mu$ g/ml ampicillin and 20  $\mu$ g/ml kanamycin, and then induced with 1mM IPTG (if required) for 10 min. For *in situ* modifications, CAA was added to 4% final concentration and the incubation was continued for 5 min. Cells were immediately collected and the plasmid DNA extracted. After denaturation of the templates, 5' labeled primer that anneals downstream of the roadblock site was added and hybridization was allowed to proceed. After primer extension with the Klenow fragment of DNA polymerase I, extension products were analyzed on an 8% sequencing gel in parallel with a dideoxy sequencing ladder.

Quantitative analyses of the *cat* and *bla* transcripts were carried out simultaneously with two 5'-labeled primers that anneal downstream of the roadblock site for the *cat* gene and at the proximal part of *bla* gene. Twenty micrograms of total RNA were used in analysis by primer extension with reverse transcriptase as previously reported (10).

## In vitro transcription

His<sup>6</sup>-RNAP (~2 pmol) was mixed with a 2-fold molar excess of DNA in 20  $\mu$ l of TB50 (10 mM MgCl<sub>2</sub>, 40 mM Tris-HCl, pH 7.9, 50 mM KCl) for 5 min at 37° followed by addition of ApUpC (10  $\mu$ M, Oligos Etc.), GTP and ATP (25  $\mu$ M) for 10 min. Next, 5  $\mu$ l TB100-equilibrated Talon Co<sup>++</sup> affinity bead suspension (Clontech) were added for 5 min at room temperature. 1  $\mu$ l [ $\alpha$ -<sup>32</sup>P] CTP (3000Ci/mmol; NEN Life Sciences Products) was added for 5 min, followed by washing of the beads in 3x1 ml TB 1000 (as TB 50 but 1000 mM NaCl) and 2x1 ml TB50. The sart-up EC was chased with 1 mM ATP, CTP, UTP and 25  $\mu$ M GTP for 10 minutes with or without 0.4  $\mu$ M Rho at 37°C. Reactions were stopped by the addition of 10  $\mu$ L Stop Buffer [1xTBE; 8M Urea; 20 mM EDTA], samples were phenol/chlorophorm extracted, ethanol precipitated and re-dissolved in 10  $\mu$ L water plus 10  $\mu$ L Stop Buffer.

## Supplemental Figures and Legends

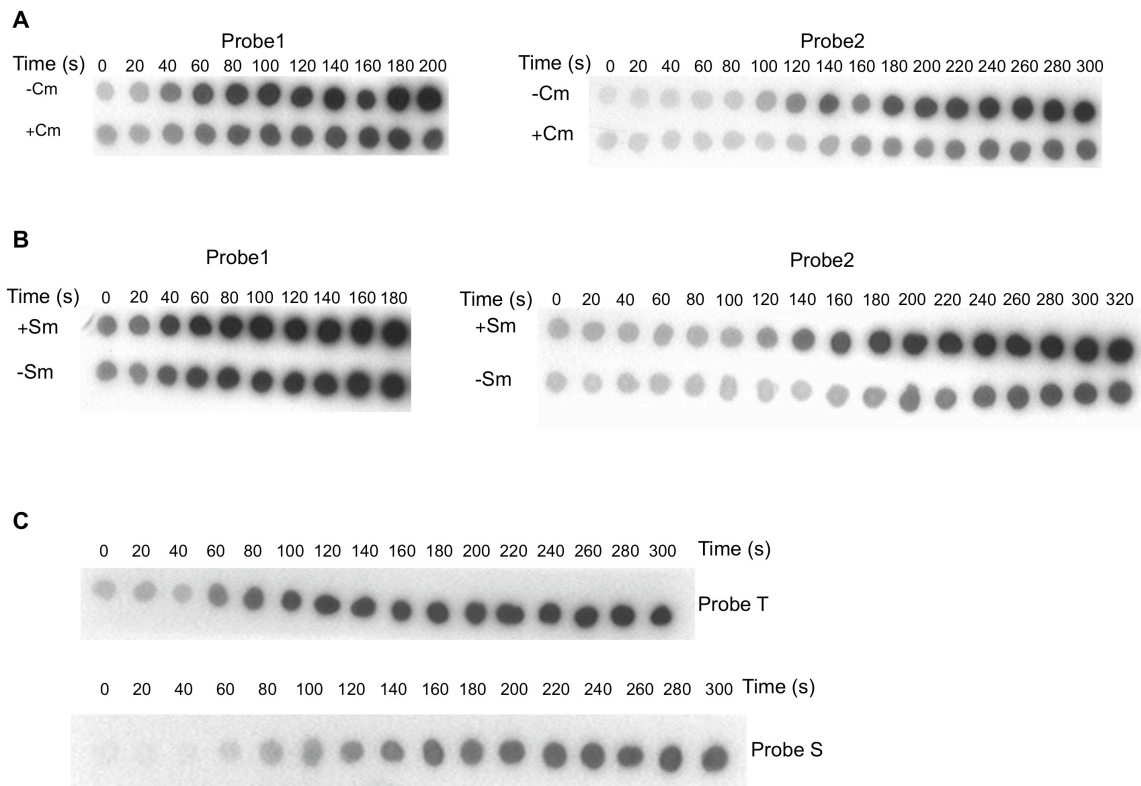

**Fig. S1. Dot blots used to generate the induction curves of Fig. 1B (A), Fig. 1C (B) and Fig. 1D (C).**

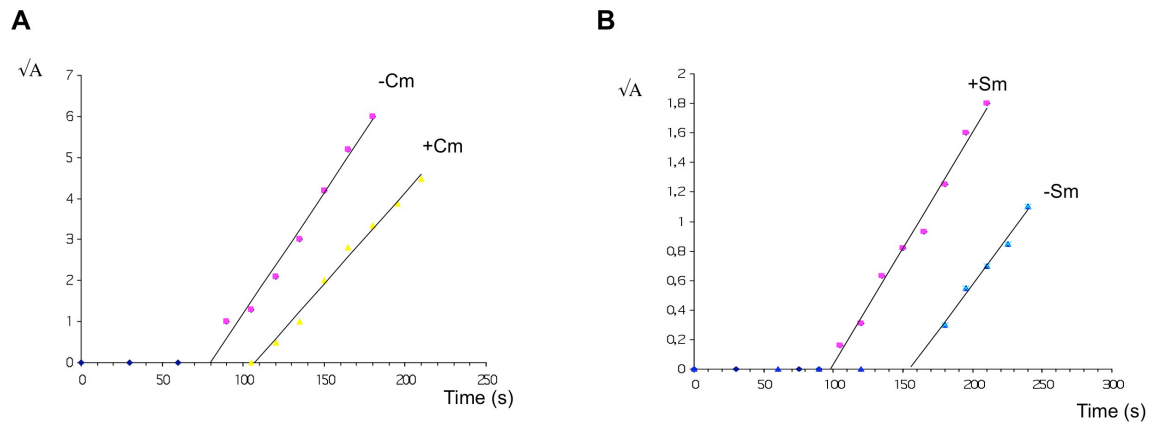

**Fig. S2.** The effect of Cm (A) and Sm (B) on the translation rate of MG1655 and Smp strains, respectively. Representative plots demonstrate the induction kinetics of  $\beta$ -galactosidase: absorbance values plotted against time. Extrapolation to an absorbance of zero gives the time required for synthesis of the first  $\beta$ -galactosidase monomers. The averaged calculated rates from three independent experiments are shown in Table 1.

*lacZ*

ATG ACC ATG ATT ACG GAT TCA CTG GCC GTC GTT TTA CAA CGT CGT GAC TGG GAA AAC CCT GGC GTT ACC CAA  
 CTT AAT CGC CTT GCA GCA CAT CCC CCT TTC GCC AGC TGG CGT AAT AGC GAA GAG GCC CGC ACC GAT CGC CCT  
 TCC CAA CAG TTG CGC AGC CTG AAT GGC GAA TGG CGC TTT GCC TGG TTT CCG GCA CCA GAA GCG GTG CCG GAA  
 AGC TGG CTG GAG TGC GAT CTT CCT GAG GCC GAT ACT GTC GTC GTC CCC TCA AAC TGG CAG ATG CAC GGT TAC  
 GAT GCG CCC ATC TAC ACC AAC GTA ACC TAT CCC ATT ACG GTC AAT CCG CCG TTT GTT CCC ACG GAG AAT CCG  
 ACG GGT TGT TAC TCG CTG ACA TTT AAT GTT GAT GAA AGC TGG CTA CAG GAA GGC CAG ACG CGA ATT ATT TTT GAT  
 GGC GTT AAC TCG GCG TTT CAT CTG TGG TGC AAC GGC CGC TGG GTC GGT TAC GGC CAG GAC AGT CGT TTG CCG  
 TCT GAA TTT GAC CTG AGC GCA TTT TTA CGC GCC GGA GAA AAC CGC CTC GCG GTG ATG GTG CTG CGT TGG AGT  
 GAC GGC AGT TAT CTG GAA GAT CAG GAT ATG TGG CCG ATG AGC GGC ATT TTC CGT GAC GTC TCG TTG CTG CAT  
 AAA CCG ACT ACA CAA ATC AGC GAT TTC CAT GTT GCC ACT CGC TTT AAT GAT GAT TTC ACG CGC GCT GTA CTG GAG  
 GCT GAA GTT CAG ATG TGC GGC GAG TTG CGT GAC TAC CTA CCG GTA ACA GTT TCT TTA TGG CAG GGT GAA ACG  
 CAG GTC GCC AGC GGC ACC GCG CCT TTC GGC GGT GAA ATT ATC GAT GAG CGT GGT GGT TAT GCC GAT CGC GTC  
 ACA CTA CGT CTG AAC GTC GAA AAC CCG AAA CTG TGG AGC GCC GAA ATC CCG AAT CTC TAT CGT GCG GTG GTT  
 GAA CTG CAC ACC GCC GAC GGC ACG CTG ATT GAA GCA GAA GCC TGC GAT GTC GGT TTC CGC GAG GTG CCG ATT  
 GAA AAT GGT CTG CTG CTG AAC GGC AAG CCG TTG CTG ATT CGA GGC GTT AAC CGT CAC GAG CAT CAT CCT  
 CTG CAT GGT CAG GTC ATG GAT GAG CAG ACG ATG GTG CAG GAT ATC CTG CTG ATG AAG CAG AAC AAC TTT AAC  
 GCC GTG CGC TGT TCG CAT TAT CCG AAC CAT CCG CTG TGG TAC ACG CTG TGC GAC CGC TAC GGC CTG TAT GTG  
 GTG GAT GAA GCC AAT ATT GAA ACC CAC GGC ATG GTG CCA ATG AAT CGT CTG ACC GAT GAT CCG CGC TGG CTA  
 CCG GCG ATG AGC GAA CGC GTA ACG CGA ATG GTG CAG CGC GAT CGT AAT CAC CCG AGT GTG ATC ATC TGG TCG  
 CTG GGG AAT GAA TCA GGC CAC GGC GCT AAT CAC GAC GCG CTG TAT CGC TGG ATC AAA TCT GTC GAT CCT TCC  
 CGC CCG GTG CAG TAT GAA GGC GGC GGA GCC GAC ACC ACG GCC ACC GAT ATT ATT TGC CCG ATG TAC GCG CGC  
 GTG GAT GAA GAC CAG CCC TTC CCG GCT GTG CCG AAA TGG TCC ATC AAA AAA TGG CTT TCG CTA CCT GGA GAG  
 ACG CGC CCG CTG ATC CTT TGC GAA TAC GCC CAC CCG ATG GGT AAC AGT CTT GGC GGT TTC GCT AAA TAC TGG  
 CAG CCG TTT CGT CAG TAT CCC CGT TTA CAG GGC GGC TTT GTC TGG GAC TGG GTG GAT CAG TCG CTG ATT AAA  
 TAT GAT GAA AAC GGC AAC CCG TGG TCG GCT TAC GGC GGT GAT TTT GGC GAT ACG CCG AAC GAT CGC CAG TTC  
 TGT ATG AAC GGT CTG GTC TTT GCC GAC CGC ACG CCG CAT CCA CCG CTG ACG GAA GCA AAA CAC CAG CAG CAG  
 TTT TTC CAG TTC CGT TTA TCC GGG CAA ACC ATC GAA GTG ACC AGC GAA TAC CTG TTC CGT CAT AGC GAT AAC  
 GAG CTC CTG CAC TGG ATG GTG GCG CTG GAT GGT AAG CCG CTG GCA AGC GGT GAA GTG CCT CTG GAT GTC GCT  
 CCA CAA GGT AAA CAG TTG ATT GAA CTG CCT GAA CTA CCG CAG CCG GAG AGC GCC GGC CAA CTC TGG CTC ACA  
 GTA CGC GTA GTG CAA CCG AAC GCG ACC GCA TGG TCA GAA GCC GGC CAC ATC AGC GCC TGG CAG CAG TGG CGT  
 CTG GCG GAA AAC CTC AGT GTG ACG CTC CCC GCC GCG TCC CAC GCC ATC CCG CAT CTG ACC ACC AGC GAA ATG

GAT TTT TGC ATC GAG CTG GGT AAT AAG CGT TGG CAA TTT AAC CGC CAG **TCA** GGC TTT CTT **TCA** CAG ATG TGG ATT  
GGC GAT AAA AAA CAA CTG CTG ACG CCG CTG CGC GAT CAG TTC ACC CGT GCA CCG CTG GAT AAC GAC ATT GGC  
GTA AGT GAA GCG ACC CGC ATT GAC **CCT** AAC GCC TGG **GTC** GAA CGC TGG AAG GCG GCG GGC CAT TAC CAG GCC  
GAA GCA GCG TTG TTG CAG TGC ACG GCA GAT **ACA** CTT GCT GAT GCG GTG CTG ATT ACG ACC GCT CAC GCG TGG  
CAG CAT CAG GGG AAA ACC **TTA** TTT ATC AGC CGG AAA ACC TAC CGG ATT GAT GGT AGT GGT CAA ATG GCG ATT  
ACC GTT GAT GTT GAA GTG GCG AGC GAT **ACA** CCG CAT CCG GCG CGG ATT GGC CTG AAC TGC CAG CTG GCG CAG  
GTA GCA GAG CGG GTA AAC TGG CTC GGA **TTA** GGG CCG CAA GAA AAC TAT **CCC** GAC CGC CTT ACT GCC GCC TGT  
TTT GAC CGC TGG GAT CTG **CCA** TTG **TCA** GAC ATG TAT ACC CCG TAC **GTC** TTC CCG AGC GAA AAC GGT CTG CGC  
TGC GGG ACG CGC GAA TTG AAT TAT GGC **CCA** CAC CAG TGG CGC GGC GAC TTC CAG TTC AAC ATC AGC CGC TAC  
AGT CAA CAG CAA CTG ATG GAA ACC AGC CAT CGC CAT CTG CTG CAC GCG GAA GAA GGC **ACA** TGG CTG AAT ATC  
GAC GGT TTC CAT ATG GGG ATT GGT **GCC** GAC GAC **TCC** TGG AGC CCG **TCA** GTA TCG GCG GAA TTC CAG CTG AGC  
GCC GGT CGC TAC CAT TAC CAG TTG **GTC** TGG TGT CAA AAA TAA

*rpIB*

ATG GCA GTT GTT AAA TGT AAA CCG **ACA** TCT CCG GGT CGT CGC CAC GTA GTT AAA GTG GTT AAC **CCT** GAG CTG  
CAC AAG GGC AAA **CCT** TTT GCT CCG TTG CTG GAA AAA AAC AGC AAA **TCC** GGT GGT CGT AAC AAC AAT GGC CGT  
ATC ACC ACT CGT CAT ATC GGT GGT GGC CAC AAG CAG GCT TAC CGT ATT GTT GAC TTC AAA CGC AAC AAA GAC  
GGT ATC CCG GCA GTT GTT GAA CGT CTT GAG TAC GAT CCG AAC CGT **TCC** GCG AAC ATC GCG CTG GTT CTG TAC  
AAA GAC GGT GAA CGC CGT TAC ATC CTG GCC **CCT** AAA GGC CTG AAA GCT GGC GAC CAG ATT CAG TCT GGC GTT  
GAT GCT GCA ATC AAA **CCA** GGT AAC ACC CTG CCG ATG CGC AAC ATC CCG GTT GGT TCT ACT GTT CAT AAC GTA  
GAA ATG AAA **CCA** GGT AAA GGC GGT CAG CTG GCA CGT **TCC** GCT GGT ACT TAC GTT CAG ATC GTT GCT CGT GAT  
GGT GCT TAT **GTC** ACC CTG CGT CTG CGT TCT GGT GAA ATG CGT AAA GTA GAA GCA GAC TGC CGT GCA ACT CTG  
GGC GAA GTT GGC AAT GGT GAG CAT ATG CTG CGC GTT CTG GTT AAA GCA GGT GCT GCA CGC TGG GTT GGT  
CGT CCG ACC GTT CGC GGT ACC GCG ATG AAC CCG GTA GAC CAC **CCA** CAT GGT GGT GGT GAA GGT CGT AAC TTT  
GGT AAG CAC CCG GTA ACT CCG TGG GGC GTT CAG ACC AAA GGT AAG AAG ACC CGC AGC AAC AAG CGT ACT GAT  
AAA TTC ATC GTA CGT CGC CGT AGC AAA TAA

*tufA*

GTG TCT AAA GAA AAA TTT GAA CGT **ACA** AAA CCG CAC GTT AAC GTT GGT ACT ATC GGC CAC GTT GAC CAC GGT  
AAA ACT ACT CTG ACC GCT GCA ATC ACC ACT GCA CTG GCT AAA ACC TAC GGC GGT GCT GCT CGT GCA TTC GAC  
CAG ATC GAT AAC GCG CCG GAA GAA AAA GCT CGT GGT ATC ACC ATC AAC ACT TCT CAC GTT GAA TAC GAC ACC  
CCG ACC CGT CAC TAC GCA CAC GTA GAC TGC CCG GGG CAC GCC GAC TAT GTT AAA AAC ATG ATC ACC GGT GCT  
GCT CAG ATG GAC GGC GCG ATC CTG GTA GTT GCT GCG ACT GAC GGC CCG ATG CCG CAG ACT CGT GAG CAC ATC  
CTG CTG GGT CGT CAG GTA GGC GTT CCG TAC ATC ATC GTT TTC CTG AAC AAA TGC GAC ATG GTT GAT GAC GAA  
GAG CTG CTG GAA CTG GTT GAA ATG GAA GTT CGT GAA CTT CTG TCT CAG TAC GAC TTC CCG GGC GAC GAC ACT  
CCG ATC GTT CGT GGT TCT GCT CTG AAA GCG CTG GAA GGC GAC GCA GAG TGG GAA GCG AAA ATC CTG GAA CTG  
GCT GGC TTC CTG GAT TCT TAT ATT CCG GAA **CCA** GAG CGT GCG ATT GAC AAG CCG TTC CTG CTG CCG ATC GAA  
GAC GTA TTC **TCC** ATC **TCC** GGT CGT GGT ACC GTT GTT ACC GGT CGT GTA GAA CGC GGT ATC ATC AAA GTT GGT  
GAA GAA GTT GAA ATC GTT GGT ATC AAA GAG ACT CAG AAG TCT ACC TGT ACT GGC GTT GAA ATG TTC CGC AAA CTG  
CTG GAC GAA GGC CGT GCT GGT GAG AAC GTA GGT GTT CTG CTG CGT GGT ATC AAA CGT GAA GAA ATC GAA CGT  
GGT CAG GTA CTG GCT AAG CCG GGC ACC ATC AAG CCG CAC ACC AAG TTC GAA TCT GAA GTG TAC ATT CTG **TCC**  
AAA GAT GAA GGC GGC CGT CAT ACT CCG TTC TTA AAA GGC TAC CGT CCG CAG TTC TAC TTC CGT ACT ACT GAC  
GTG ACT GGT ACC ATC GAA CTG CCG GAA GGC GTA GAG ATG GTA ATG CCG GGC GAC AAC ATC AAA ATG GTT GTT  
ACC CTG ATC CAC CCG ATC GCG ATG GAC GAC GGT CTG CGT TTC GCA ATC CGT GAA GGC GGC CGT ACC GTT GGC  
GCG GGC GTT GTT GCT AAA GTT CTG GGC TAA

*infB*

ATG **ACA** GAT GTA ACG ATT AAA ACG CTG GCC GCA GAG CGA CAG ACC **TCC** GTG GAA CGC CTG GTA CAG CAA TTT  
GCT GAT GCA GGT ATC CCG AAG TCT GCT GAC GAC TCT GTG TCT GCA CAA GAG AAA CAG ACT TTG ATT GAC CAC  
CTG AAT CAG AAA AAT **TCA** GGC CCG GAC AAA TTG ACG CTG CAA CGT AAA **ACA** CGC AGC ACC CTT AAC ATT **CCT**  
GGT ACC GGT GGA AAA AGC AAA TCG GTA CAA ATC GAA **GTC** CCG AAG AAA CGC ACC TTT GTG AAA CGC GAT CCG  
CAA GAG GCT GAA CGC CTT GCA GCG GAA GAG CAA GCG CAG CGT GAA GCG GAA GAG CAA GCC CGT CGT GAG GCA  
GAA GAA TCG GCT AAA CGC GAG GCG CAA CAA AAA GCT GAA CGT GAG GCC GCA GAA CAA GCT AAG CGT GAA GCT  
GCT GAA CAA GCG AAA CGT GAA GCT GCG GAA AAA GAC AAA GTG AGC AAT CAA CAA GAC GAT ATG ACT AAA AAC  
GCC CAG GCT GAA AAA GCC CGC CGT GAG CAG GAA GCT GCA GAG CTC AAG CGT AAA GCT GAA GAA GAA GCG CGT  
CGT AAA CTC GAA GAA GAA GCA CGT CGC GTT GCT GAA GAA GCA CGT CGT ATG GCG GAA GAA AAC AAA TGG ACT  
GAT AAC GCG GAA CCG ACT GAA GAT **TCC** AGC GAT TAT CAC **GTC** ACT ACT TCT CAA CAT GCT CGC CAG GCA GAA  
GAC GAA AGC GAT CGT GAA **GTC** GAA GGC GGC CGT GGC CGT GGT CGT AAC GCG AAA GCA GCG CGT CCG AAG AAA  
GGC AAC AAA CAC GCT GAA **TCA** AAA GCT GAT CGT GAA GAA GCA GCG GCA GCA GTA CGT GGC GGT AAA GGC GGA  
AAA CGT AAA GGT TCT TCG CTG CAG CAA GGC TTC CAG AAG **CCT** GCT CAG GCC GTT AAC CGT GAC GTT GTG ATC  
GGC GAA ACT ATC ACC GTT GGC GAA CTG GCG AAC AAG ATG GCG GTT AAA GGC TCT CAG **GTC** ATC AAA GCG ATG  
ATG AAA CTG GGC GCA ATG GCA ACC ATC AAC CAG GTT ATC GAT CAG GAA ACC GCA CAG CTG GTT GCT GAA GAG  
ATG GGC CAT AAA GTT ATC CTG CGT GAT GAA AAC GAG CTG GAA GAG GCG GTA ATG AGC GAC CGT GAC CAG GGT  
GCT GCG GCT GAA CCG CGC GCG CCG GTT GTG ACC ATC ATG GGT CAC GTT GAC CAC GGT AAA ACC TCT CTG CTG  
GAC TAC ATT CGT **TCA** ACG AAA GTG GCC TCT GGC GAA GCG GGC GGC ATT ACC CAG CAC ATT GGT GCA TAC CAC  
GTT GAA ACT GAA AAC GGC ATG ATC ACC TTC CTG GAC ACC CCG GGC CAC GCC GCG TTT ACT **TCA** ATG CGT GCT

CGT GGT GCG CAG GCA ACG GAC ATC GTA **GTC** CTG GTT GTT GCT GCC GAC GAC GGT GTG ATG CCG CAG ACC ATC  
 GAA GCA ATC CAG CAC GCG AAA GCG GCG CAG GTA CCG GTG GTG GTT GCA GTG AAC AAG ATC GAT AAA **CCA** GAA  
 GCT GAT CCG GAT CGC GTT AAG AAC GAA CTC **TCC** CAG TAC GGC ATC CTG CCG GAA GAG TGG GGC GGT GAA AGC  
 CAG TTC GTA CAC GTA TCT GCG AAA GCG GCT ACC GGT ATC GAT GAA CTG CTG GAC GCT ATC CTG CTG CAG GCG  
 GAA GTT CTG GAG CTG AAA GCG GTA CGT AAA GGT ATG GCG AGC GGT GCG GTT ATC GAA **TCC** TTC CTC GAT AAA  
 GGT CGT GGT CCG GTT GCT ACC GTT CTG GTA CGT GAA GGT ACT CTG CAC AAG GGC GAT ATC GTT CTG TGT GGC  
 TTC GAA TAC GGT CGT GTT CGT GCG ATG CGT AAC GAA CTG GGT CAG GAA GTG CTG GAA GCG GGT CCG **TCC** ATT  
 CCG GTG GAA ATC CTC GCG CTG **TCC** GGC GTA CCG GCT GCG GGT GAT GAA GTT ACC GTT GTA CGT GAC GAG AAG  
 AAA GCG CGT GAA GTT GCA CTC TAT CGT CAG GGT AAA TTC CGC GAA GTT AAA CTG GCG **CGT** CAG CAG AAA TCT  
 AAA CTC GAG AAC ATG TTC GCC AAC ATG ACC GAA GGC GAA GTT CAC GAA GTG AAT ATC **GTC** CTG AAG GCA GAC  
 GTA CAG GGT TCT **GTC** GAA GCG ATC **TCC** GAC **TCC** TTG CTG AAA CTG TCT ACT GAC GAA GTT AAA GTG AAG ATC  
 ATC GGT TCT GGC GTA GGT GGT ATC ACC GAA ACC GAC GCC ACC CTG GCT GCG GCG **TCC** AAC GCC ATC CTG GTT  
 GGC TTT AAC GTA CGT GCT GAT GCC TCT GCA CGT AAA GTG ATT GAA GCG GAA AGC CTG GAT CTG CGT TAC TAC  
**TCC** **GTC** ATC TAT AAC CTG ATT GAC GAA GTG AAA GCG GCG ATG AGC GGT ATG CTG TCT CCG GAA CTG AAA CAG  
 CAG ATT ATC GGT CTG GCG GAA GTT CGT GAC GTG TTC AAA TCG CCG AAA TTT GGT GCC ATC GCA GGC TGT ATG  
 GTT ACC GAA GGT GTG GTT AAA CGT CAC AAC CCG ATC CCG GTT CTG CGT GAC AAC GTG GTT ATC TAC GAA GGC  
 GAG CTG GAG **TCC** CTG GCG GCG TTC AAA GAT GAC GTT AAC GAA **GTC** CGT AAC GGT ATG GAA TGT GGT ATC GGC  
 GTT AAG AAC TAC AAC GAC **GTC** GCG ACT GGC GAT GTG ATC GAA GTA TTC GAA ATC ATC GAG ATC CAA CGT ACC  
 ATT GCT TAA

srb4

ATG **ACA** ACG GAA GAT **CCA** GAT **TCA** AAT CAC **TTA** AGT **TCC** GAA ACT GGC ATT AAA TTG GCA TTG GAC CCG AAC **TTA**  
 ATT **ACA** TTG GCA **CTA** AGT TCT AAT **CCA** AAC TCT AGC CTT CAT **TCA** **CCA** ACG TCT GAT GAA **CCC** GTA **CCT** GAA TCT  
 GCA GGA AAA GCA GAT ACT AGT ATT CGA **CTA** GAA GGT GAT GAG **TTA** GAG AAT AAA ACT AAG AAA GAC AAT GAT  
 AAG AAC **TTA** AAA TTT TTG AAG AAT AAA GAT TCT **CTA** **GTC** AGT AAT **CCA** CAC GAA ATT TAT GGC **TCC** ATG CCG TTG  
 GAG CAA TTG ATC **CCA** ATC ATC **TTA** AGA CAG CGT GGT **CCA** GGC TTT AAA TTC GTT GAT **TTA** AAT GAA AAA GAA TTG  
 CAA AAT GAG ATT AAG CAG CTT GGT AGT GAT AGT AGT GAC GGT CAT AAC AGC GAG AAG AAG GAC ACT GAT GGC  
 GCT GAT GAG AAT GTA CAA ATT GGA GAA ATG TTC ATG GAA GTG GAT TAT GAA GAT AAA GAT AAT **CCA** GTG GAT **TCA**  
 CGA AAT GAA **ACA** GAC CAC AAA ACG AAT GAA AAT GGC GAG ACC GAT GAT AAT ATT GAA ACG GTA ATG **ACA** CAG  
 GAA CAG TTT GTT AAA AGA **AGG** **AGG** GAT ATG **CTA** GAG CAT ATA AAT CTG GCC ATG AAC GAA TCG TCT TTG GCT TTG  
 GAA TTC GTT TCT TTG **CTA** CTG TCG AGT GTT AAA GAG TCT **ACA** GGT ATG **TCA** **TCA** ATG **TCA** **CCA** TTT CTT **AGG** AAA  
 GTT GTT AAA **CCT** TCT AGT **TTA** AAC AGT GAT AAA ATT **CCA** TAT GTT GCA **CCT** **ACA** AAA AAA GAA TAT ATC GAG TTG  
 GAT ATA TTG AAT AAG GGA TGG AAG **TTA** CAA AGT **TTA** AAC GAA TCT AAA GAT CTC **CTA** GCG GCA AGT TTT AAT AAA  
 CTG AGT **TCC** ATA **TTA** CAG AAC GAA CAT GAC TAT TGG AAT AAG ATA ATG CAG AGT ATT AGC AAC AAG GAT GTT ATT  
 TTT AAG ATT **AGG** GAC **AGG** ACT AGT GGT CAA AAG CTG TTG GCA ATT AAG TAT GGT TAC GAA GAC TCT GGA TCT ACC  
 TAT AAG CAT GAC AGA GGT ATT GCT AAT ATA **AGG** AAT AAT ATA GAA **TCA** CAA AAT TTG GAT TTG ATA **CCC** CAC AGT  
 AGT **TCA** GTG TTC AAA GGC ACT GAT TTC GTA CAT **TCA** GTA AAG AAA TTC **TTA** **AGG** GTT CGT ATC TTC **ACA** AAA ATC  
 GAA **TCA** GAA GAT GAT TAC ATA TTG AGT GGC GAA AGT GTG ATG GAT **AGG** GAT AGT GAA AGT GAA GAA GCT GAA  
 ACG AAA GAT ATC AGA AAG CAA ATC CAA CTT TTG AAA AAG ATC ATT TTT GAA AAA GAA CTG ATG TAC CAA ATA AAG  
 AAA GAA TGC GCT TTG TTG ATT **TCC** TAT GGT **GTC** AGT ATT GAA AAC GAA AAC AAG GTA ATA ATT GAA **CTA** **CCT** AAC  
 GAA AAA TTT GAA ATC GAG TTG TTG **TCC** CTT GAC GAT GAC **TCC** ATT **GTC** AAT CAT GAA CAA GAC **TTA** **CCA** AAA ATC  
 AAC GAC AAG AGA GCA AAT **TTA** ATG CTT GTT ATG TTG AGA **CTA** **TTA** **TTA** **GTC** GTT ATA TTC AAG AAA **ACA** **TTA** CGA  
 TCG AGA ATA AGC **TCA** **CCC** CAC GGA CTG ATC AAT TTG AAT GTT GAC GAT GAT ATC **TTA** ATA ATA CGT **CCC** ATT CTT  
 GGT AAA GTT CCG TTT GCT AAT TAC AAA CTG **TTA** **CTA** AAA AAA ATC ATA AAG GAT TAC GTG CTC GAT ATA GTT **CCT**  
 GGC **TCA** AGT ATA **ACA** GAA ACG GAA GTT GAG AGA GAA CAA **CCT** CAA GAA AAT AAA AAC ATT GAT GAT GAA AAT ATA  
 ACT AAA **TTA** AAT AAA GAG ATC CGT GCC TTC GAT AAA **CTA** TTG AAT ATA **CCT** AGA CGT GAA CTC AAA ATA AAT **CTA**  
**CCA** **TTA** ACT GAG CAC AAA AGC **CCT** AAT **CTA** AGT **TTA** ATG CTC GAA AGT **CCT** AAC TAT TGT AAC GCA CTC ATT CAC  
 ATC AAG TTT **TCA** GCT GGT ACG GAA GCC AAC GCA GTG **TCC** TTT GAC **ACA** **ACA** TTT TCT GAT TTT AAA GAA GTA GAG  
 GAC TTC **CTA** CAT TTT ATT **GTC** GCT GAG TAC ATC CAG CAA AAG AAG GTG TAA

**Fig. S3. Rare codons distribution in the tested genes.** tRNA species for 8 triplets (CUA, UCC, ACA, CCU, CCC, UCA, CCA, AGG) are extremely scarce in *E. coli* (12). In addition, two moderately used codons (UUA and GUC) are also limited by their tRNA concentrations. In total, these 10 rare codons are expected to produce the slowest translation rates (13).

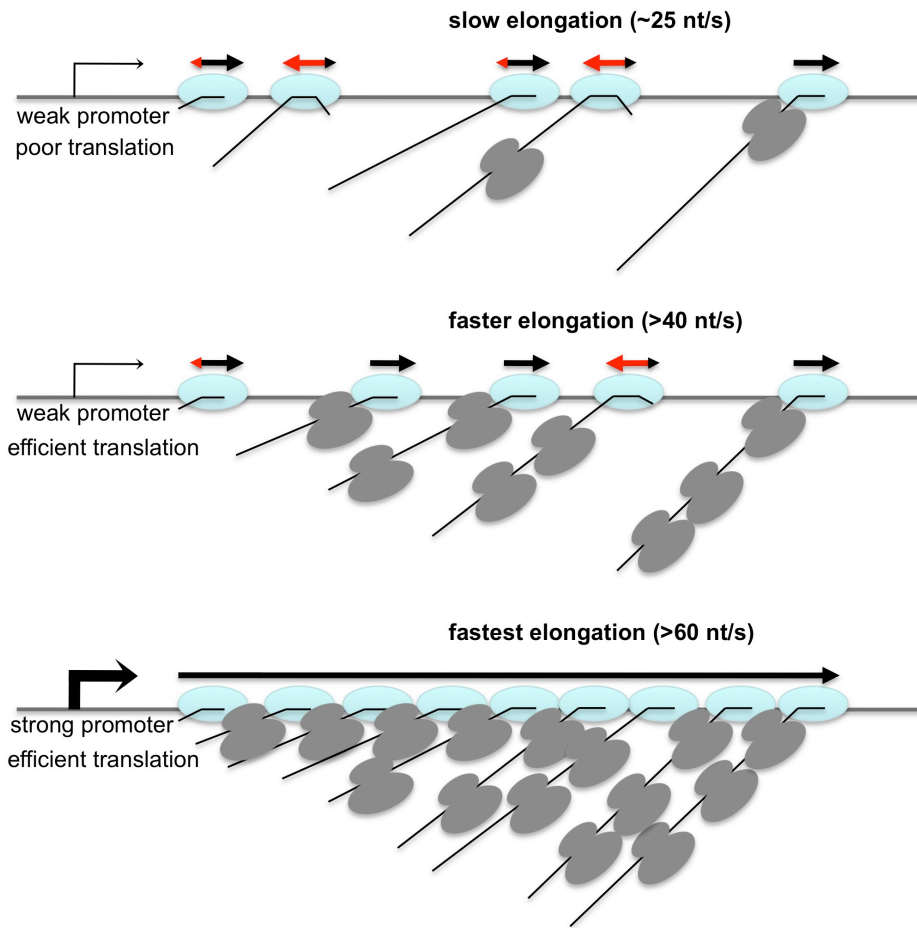

**Fig. S4. Macromolecular trafficking and cooperation in controlling bacterial gene expression.** Schematics summarize the results of the present study, which together with our previous study (4), establish a relationship between promoter strength, translation and transcription elongation rates. Trailing ECs and ribosomes are capable of “pushing” the leading ECs forward by physically suppressing RNAP backtracking (indicated by red arrows). Thus, the more RNAP molecules engaged in transcription of a gene, and the higher the speed of its translation, the faster its overall transcription elongation rate. Since elongation is usually the rate-limiting step of the transcription cycle (it takes minutes to complete a transcript), such a direct coordination between initiation, elongation and translation ensures precise adjustment of the transcriptional yield to translational needs. The cooperation mechanism explains why the transcription elongation rate matches the translation elongation rate so precisely (Table 1), and how transcription elongation depends on codon usage (Table 2), growth phase (fig. S5), growth rate (fig. S6) (2), and promoter strength (4).

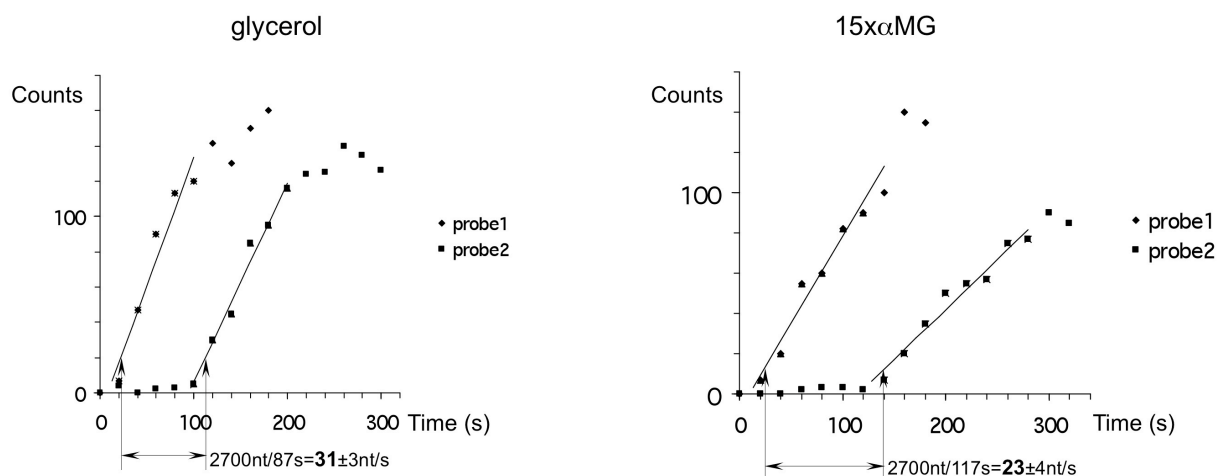

**Fig. S5. Effect of carbon source on transcription elongation rate.** Panels display representative induction curves used to calculate the elongation rate. Rates were calculated as in Fig. 1A. “Glycerol” – cells were grown in M9 minimal media supplemented with glycerol (0.5%) and Casamino Acids (0.2%); “αMG” – cells were grown in glucose minimal media in the presence of α-methyl-glucoside at the 15x to glucose ratio.

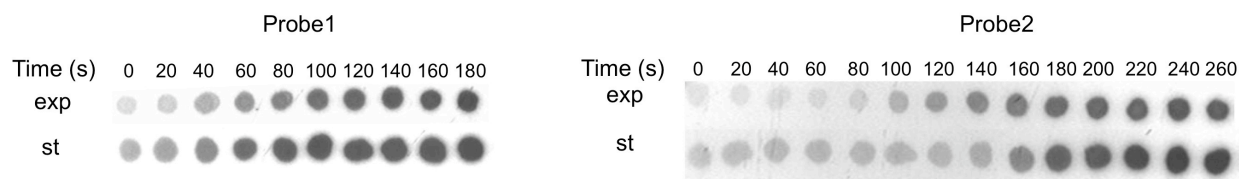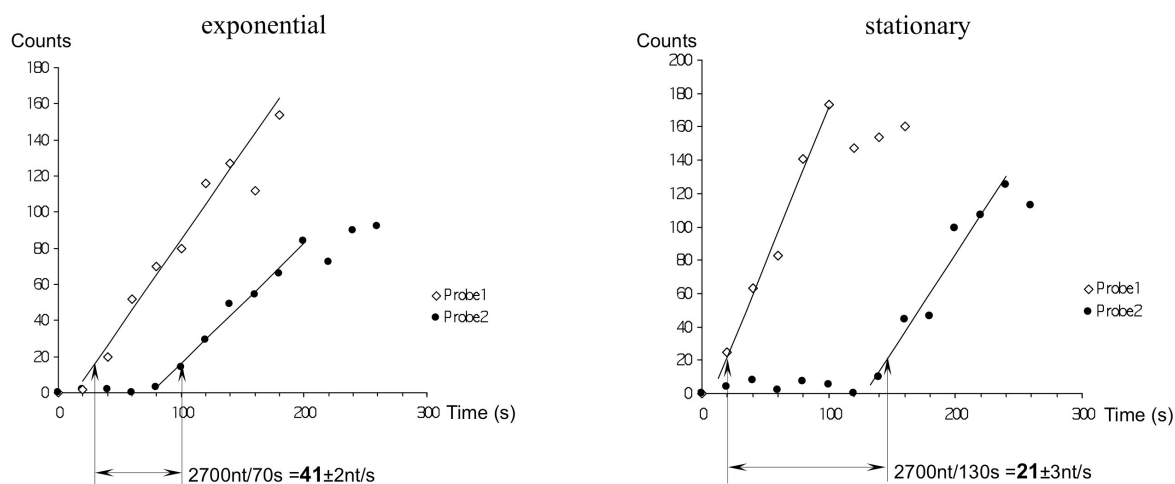

**Fig. S6. Transcription elongation rate depends on growth phase.** Representative dot blots of the early (1) and late (2) probes from the early exponential ( $OD_{600} \sim 0.4$ ) and stationary ( $OD_{600} \sim 2.5$ ) phase of growth of MG1655 were used to generate the induction curves shown. Rates were calculated as in Fig. 1A.



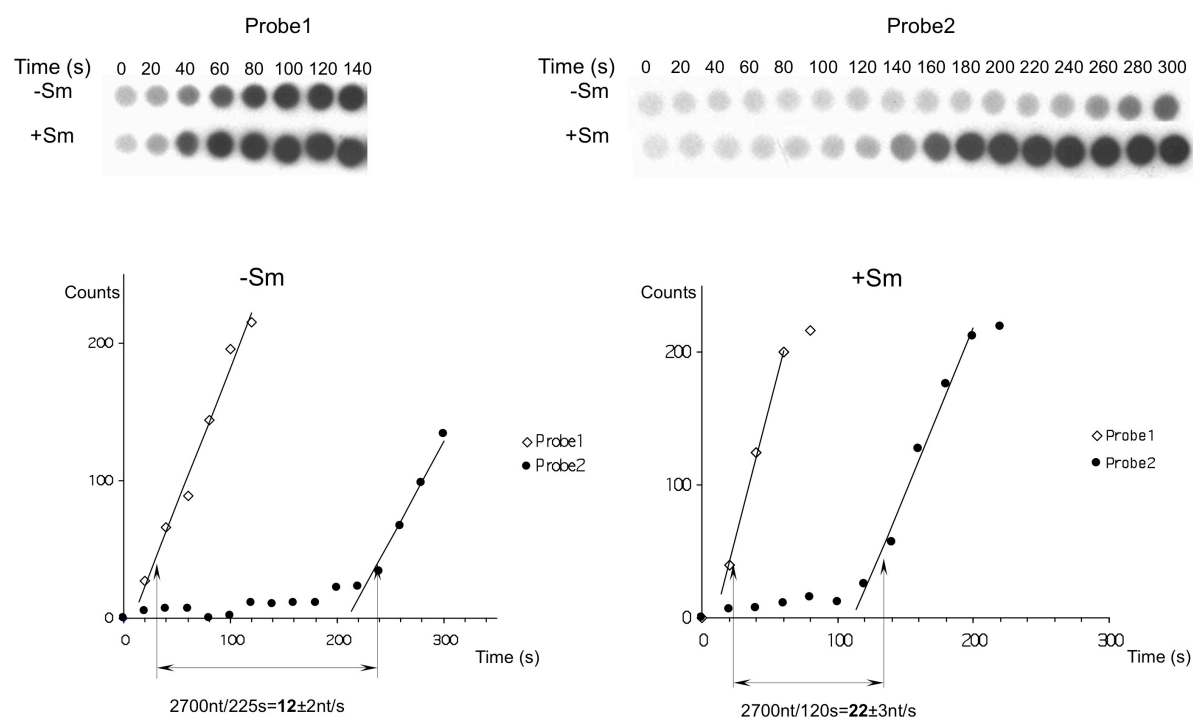

**Fig. S7. Effect of the slow ribosome mutation (*rpsL*[SmP]) and streptomycin (Sm) on transcription elongation rate in the stationary phase.** Representative dot blots of the early (1) and late (2) probes from the stationary ( $OD_{600} \sim 2.5$ ) phase of growth of the “slow ribosome” strain CH184 were used to generate the induction curves shown. Rates were calculated as in Fig. 1A. Slow transcription rate of CH184, as compared to that of MG1655 (fig. S6), and its acceleration by Sm demonstrate that the transcription elongation rate remains under tight translational control in the stationary phase of growth.

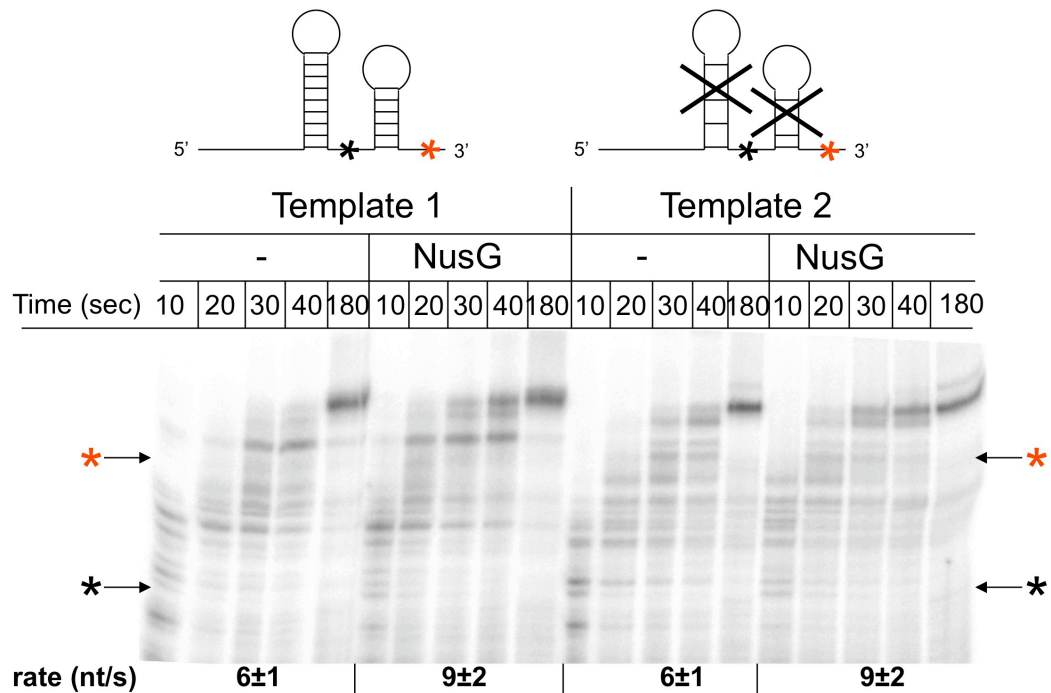

**Fig. S8. Effect of local secondary structures and NusG on the elongation rate in vitro.**

Templates 1 and 2 are identical in sequence, except in two strong hairpins that are mutated in template 2 so they cannot fold: hairpins #1 and #2 have 9 and 6 bp perfect GC-rich stems, respectively, and Template 2 carries three mismatches in each of the hairpins stem. Asterisks indicate the location of potential pause sites (7-10 nt downstream of the base of the hairpin stem), which are not detectable under specified chase conditions (10  $\mu$ M NTPs) in either case. No difference in the overall elongation rates (nt/s) is detected between the two templates, demonstrating that neither hairpin affects the rate of elongation. Moreover, the anti-backtracking factor NusG (0.1 mg/ml) increased the rate of elongation to the same extent on both templates. Thus, backtracking-type pauses, not hairpins, determine the elongation rate. In vivo footprinting and roadblocking experiments (Fig. 3 and 4) demonstrate that the ribosome suppresses RNAP backtracking. We, therefore, conclude that the stimulating effect of a ribosome on transcription elongation occurs predominantly as a result of its anti-backtracking mechanism.

## Supplemental References and Notes

1. T. Ruusala, D. Andersson, M. Ehrenberg, C.G. Kurland, *EMBO J.* **3**, 2575 (1984).
2. U. Vogel, K.F. Jensen, *J. Bacteriol.* **176**, 2807 (1994).
3. V. Epshtein, F. Toulmé, A.R. Rahmouni, S. Borukhov, E. Nudler, *EMBO J.* **22**, 4719 (2003).
4. V. Epshtein, E. Nudler, *Science* **300**, 801-805 (2003).
5. D.I. Andersson, K. Bohman, L.A. Isaksson, C.G. Kurland, *Mol. Gen. Genet.* **187**, 467 (1982).
6. K. Bohman, T. Ruusala, P.C. Jelenc, C.G. Kurland, *Mol. Gen. Genet.* **198**, 90 (1984).
7. J.H. Miller, in *Experiments in molecular genetics* (Cold Spring Harbor Laboratory, NY, 1972).
8. R. Schleif, W. Hess, S. Finkelstein, D. Ellis, *J. Bacteriol.* **115**, 9 (1973)
9. M. Guérin, M. Leng, A.R. Rahmouni, *EMBO J.* **15**, 5397 (1996).
10. F. Toulmé, M. Guérin, N. Robichon, M. Leng, A.R. Rahmouni, *EMBO J.* **18**, 5052 (1999).
11. F. Toulmé, C. Mosrin-Huaman, J. Sparkowski, A. Das, M. Leng, A.R. Rahmouni, *EMBO J.* **19**, 6853 (2000).
12. G. Zhang, M. Hubalewska, Z. Ignatova, *Nat Struct Mol Biol.* **16**, 274-80 (2009).
13. G. Zhang, Z. Ignatova, *PLoS One* **4**, e5036 (2009).
14. Our results imply that the ribosome has to be *immediately* behind the moving RNAP most of the time to control the overall rate of RNAP movement. Indeed, translation initiation (including 30S-mRNA complex formation, 50S binding, and IF3 release) occurs in less than 2 seconds at the majority of genes in E.coli (15, 16). In this short time window RNAP can only move 20-40 nt away from RBS. Because RNAP elongates much slower in the absence of translation (Table 1), the ribosome should be able to catch up to RNAP within the first 100-200 nt. RBS mutations do not affect significantly the rate of initiation unless ribosome binding is impaired by a strong secondary structure, which is rare (17). Therefore, for the majority of E.coli genes there must be only short stretches of naked RNA between the moving RNAP and the first trailing ribosome (the one which determines the rate of transcription) in the beginning of a gene. The minimal distance between the ribosome and RNAP should also prevent Rho from terminating transcription prematurely; Rho requires only about 100 nt of naked RNA (without strong hairpins) to load and terminate transcription (18).
15. S. M. Studer, S. Joseph, *Methods Enzymol.* **430**, 31-44 (2007).
16. P. Milon, A.L. Konevega, C.O. Gualerzi, M.V. Rodnina, *Mol Cell* **30**, 712-720 (2008).
17. M.H. de Smit, J. van Duin, *Proc Natl Acad Sci U S A.* **87**, 7668-7672 (1990).
18. C.M. Hart, J.W. Roberts. *J Biol Chem.* **266**, 24140-24148 (1991).
